# Supplementary material for: The Paleocene record of marine diatoms in deep-sea sediments
Source: Copernicus journal article supplement (doi:10.5194/fr-21-183-2018), 2018-08-20
Supplement: Supplementary file 3 [file fr-21-183-2018-supplement.zip]

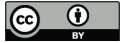

## *Supplement of*

# **The Paleocene record of marine diatoms in deep-sea sediments**

**Johan Renaudie et al.**

*Correspondence to:* Johan Renaudie ([johan.renaudie@mf.n.berlin](mailto:johan.renaudie@mf.n.berlin))

- fr-21-183-2018-supplement-title-page.pdf
- Supplement
  - .DS\_Store
  - Biostrat
    - \* 1121B\_bstrat.txt
    - \* 1121B\_loc.txt
    - \* 208\_btrat.txt
    - \* 208\_loc.txt
    - \* 327A.txt
    - \* 327A\_loc.txt
    - \* 524\_btrat.txt
    - \* 524\_loc.txt
    - \* 700B\_btrat.txt
    - \* 700B\_loc.txt
    - \* 752A\_btrat.txt
    - \* 752A\_loc.txt
    - \* 761B\_btrat.txt
    - \* 761B\_loc.txt
    - \* 86\_bstrat.txt
    - \* 86\_loc.txt
    - \* 96\_bstrat.txt
    - \* 96\_loc.txt
  - Figure S1 - Cohort analysis including NSB data.pdf
  - Figure S2.pdf
  - Figure S3.pdf
  - Read Me.txt
  - Table S1 - Occurrences.csv

- Table S2 - Counts.csv
- Table S3 - Neptune\_diatom\_data\_2018-03-27.csv

The copyright of individual parts of the supplement might differ from the CC BY 4.0 License.
