# Supplementary figures and images for: The Paleocene record of marine diatoms in deep-sea sediments
Source: Copernicus journal article supplement (doi:10.5194/fr-21-183-2018), 2018-08-20

Subsampled species richness

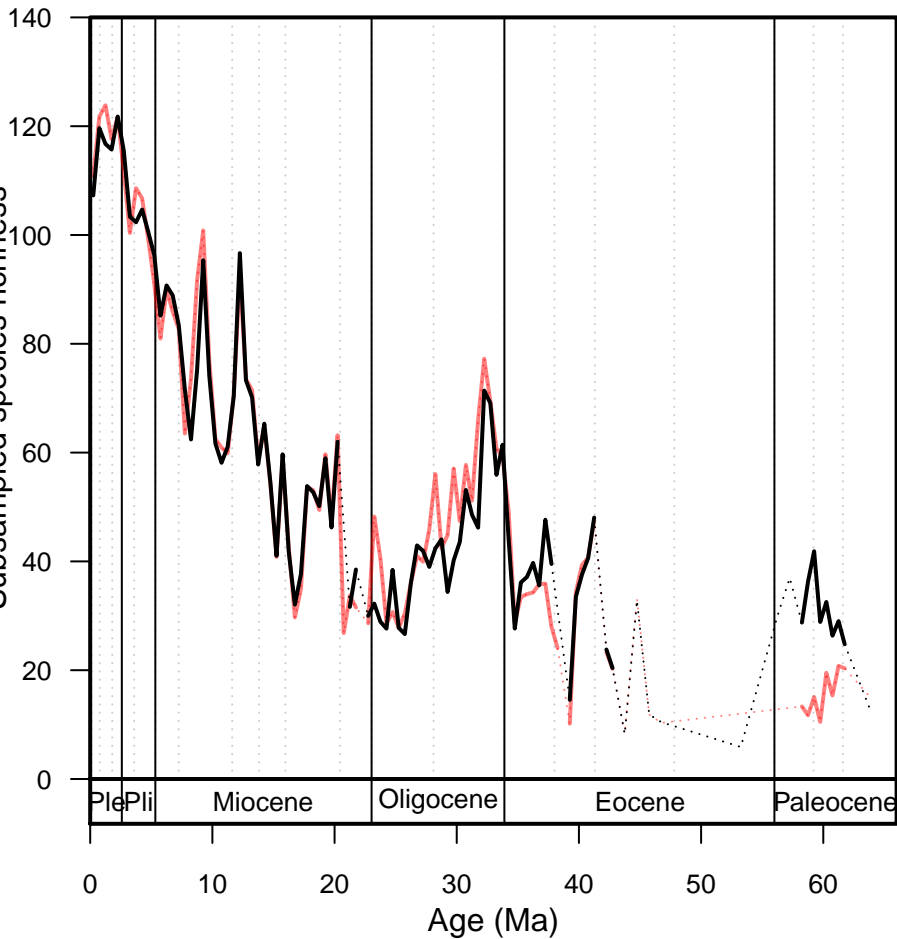

Supplement: Supplementary file 1 [file fr-21-183-2018-supplement.zip]

Subsampled diatom diversity

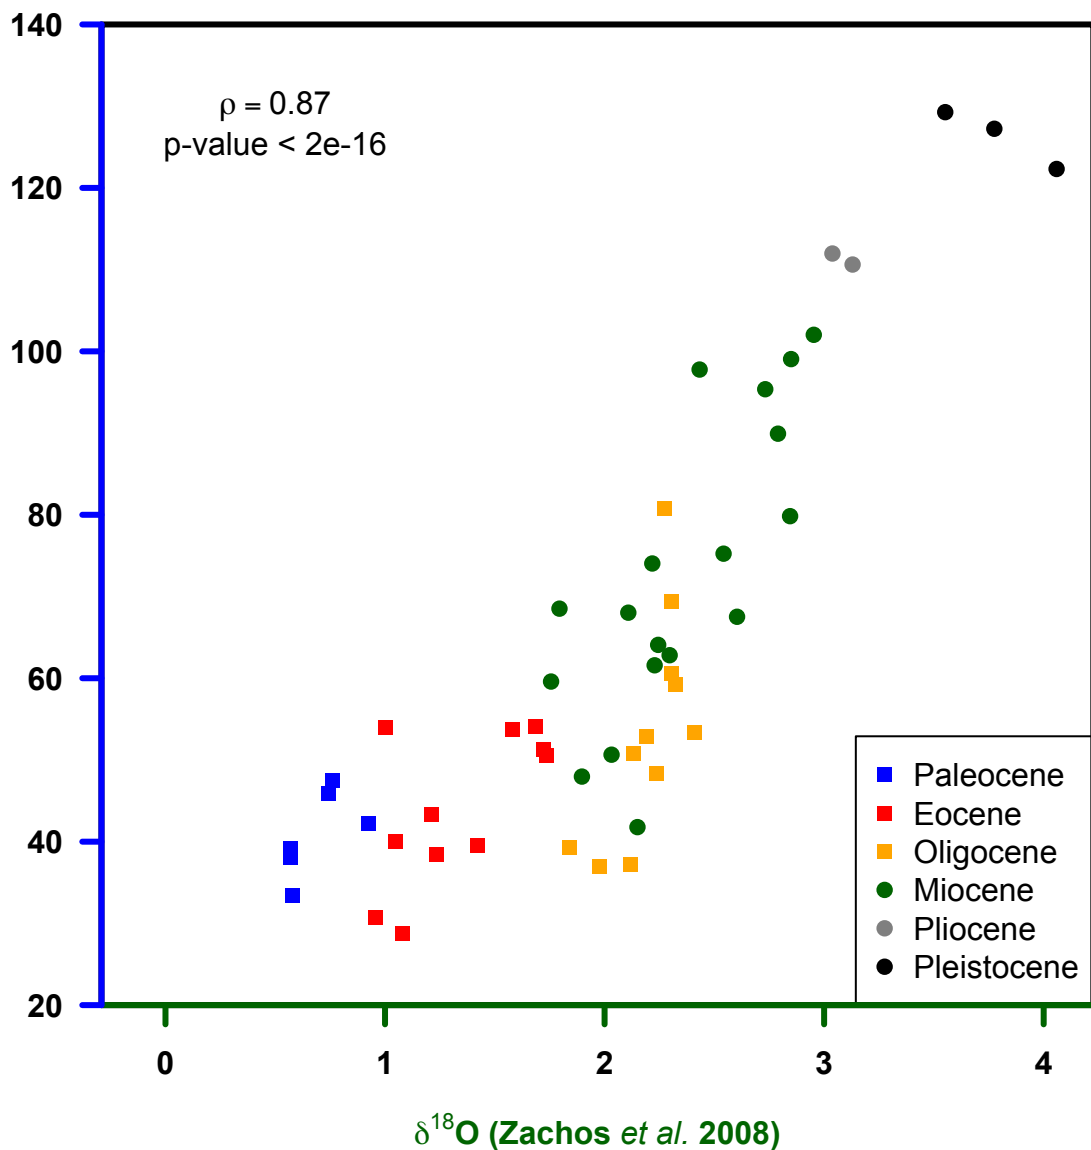

Supplement: Supplementary file 2 [file fr-21-183-2018-supplement.zip]

Age (Ma)

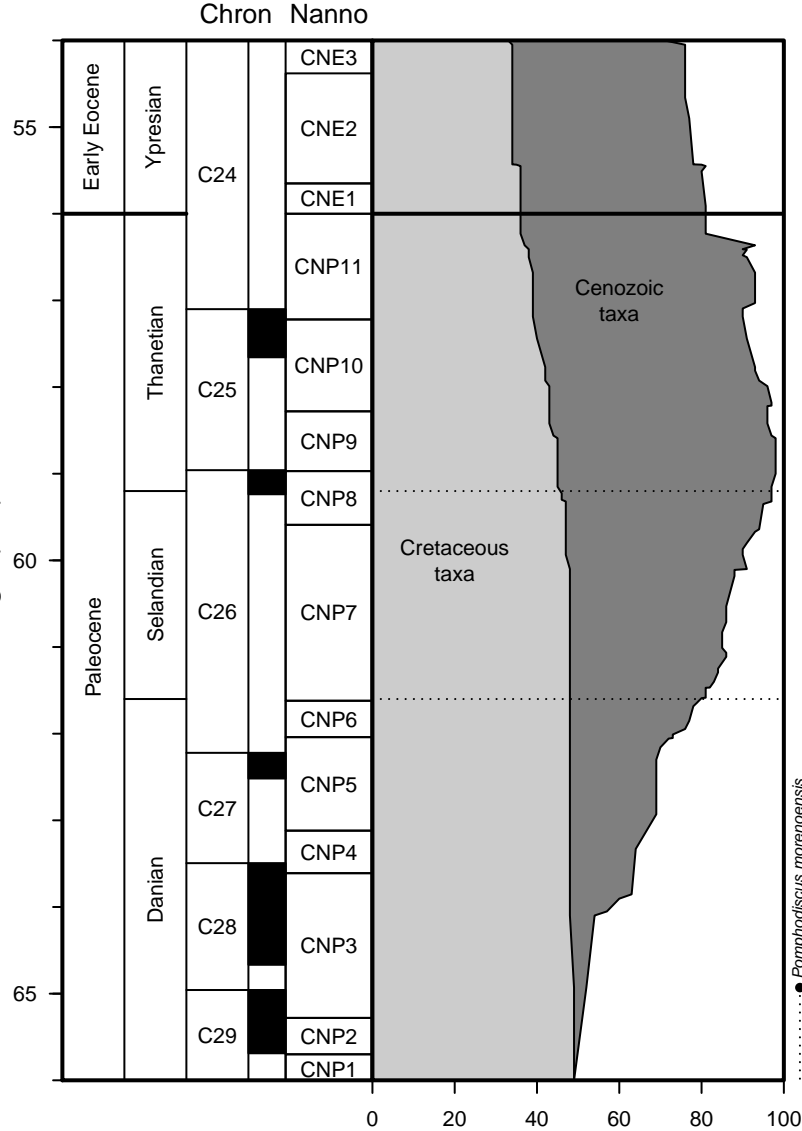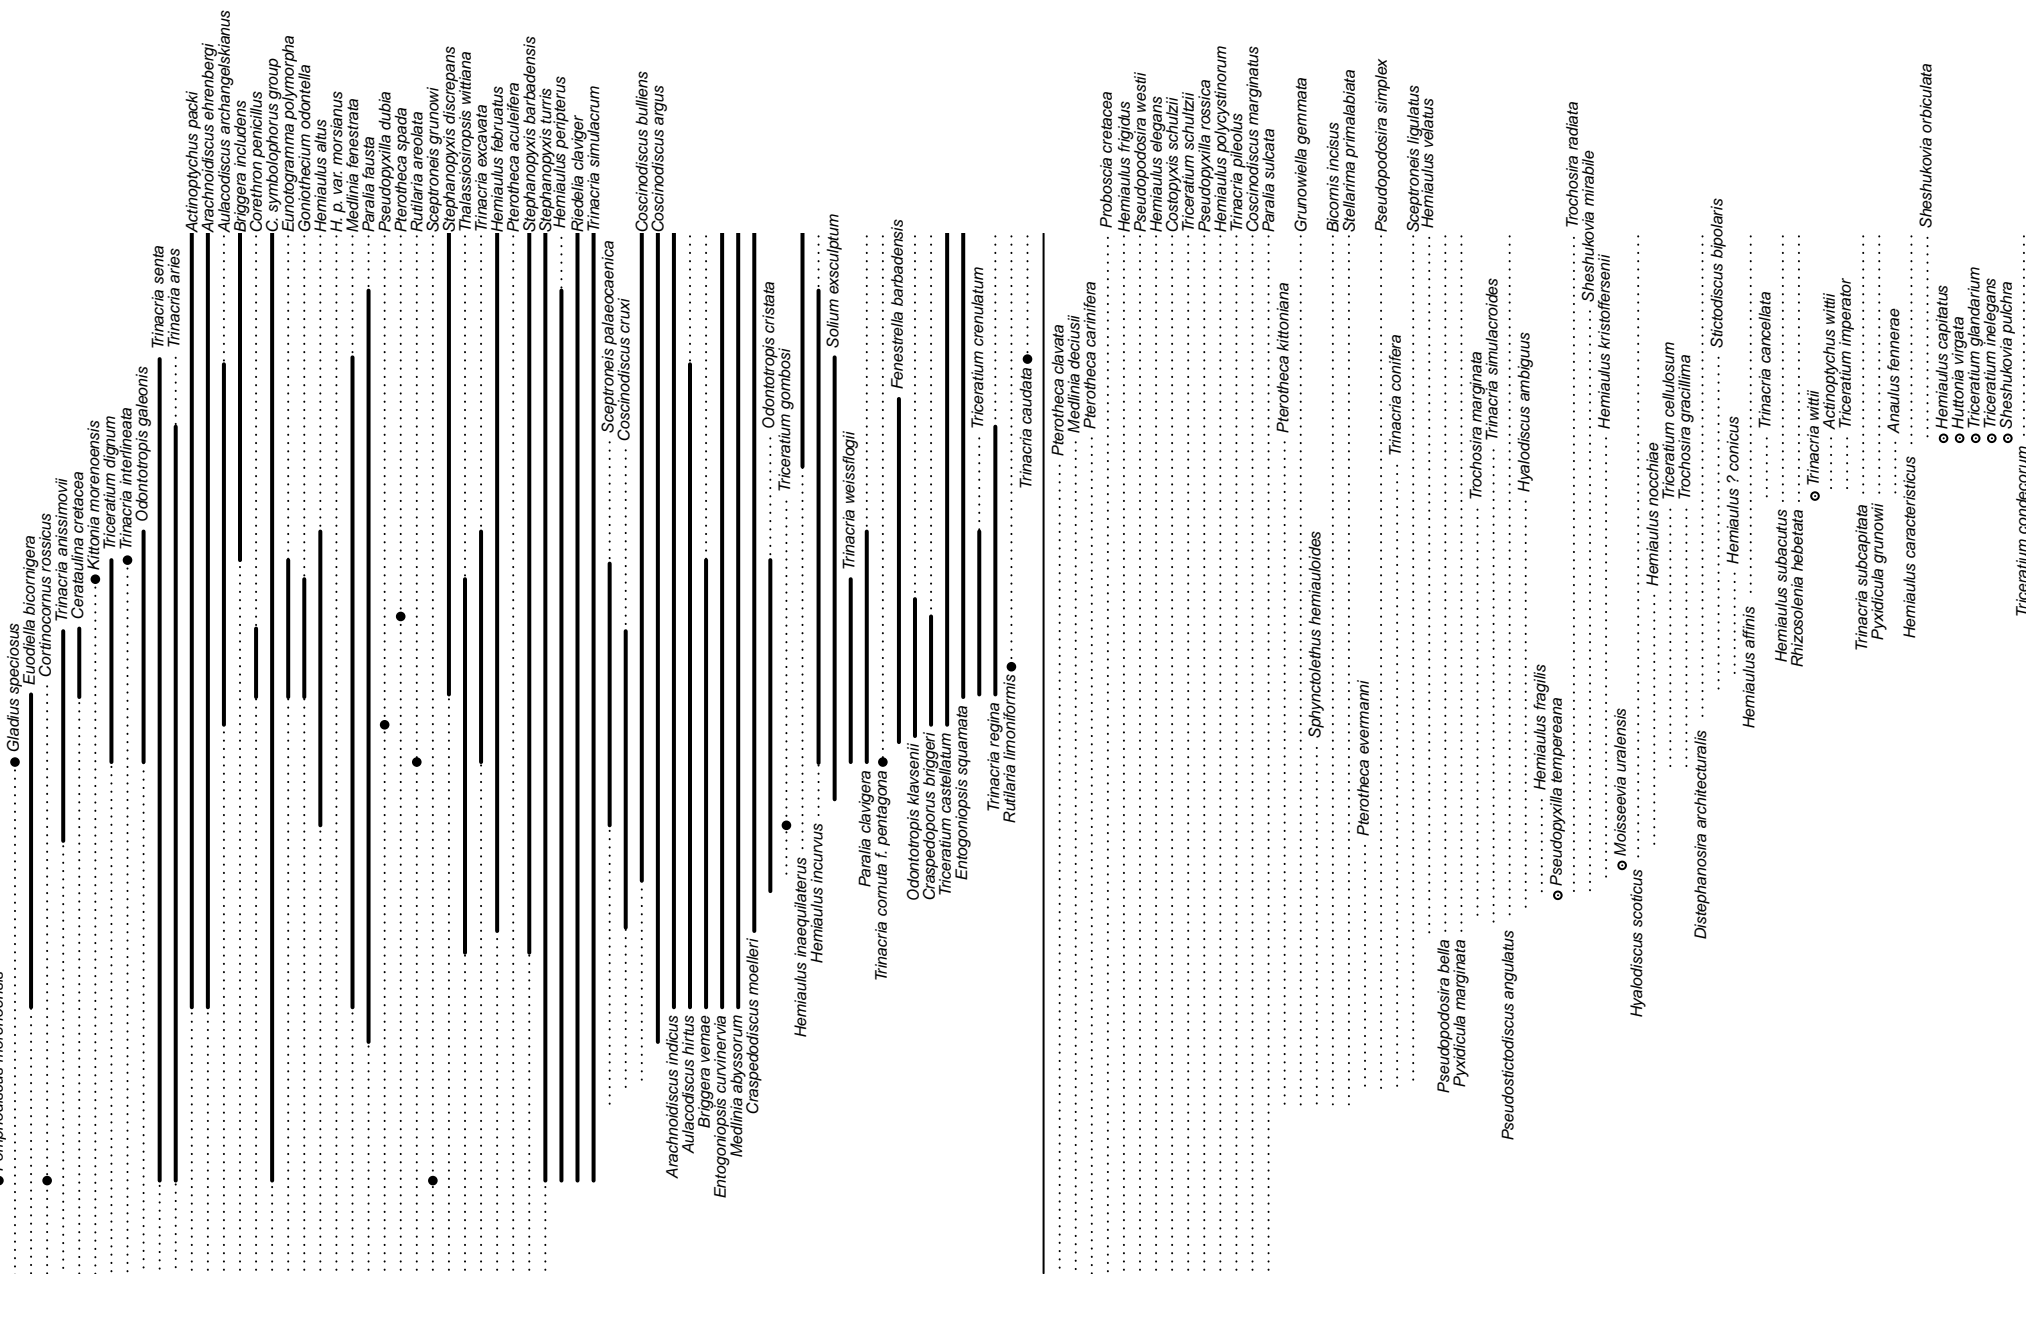

Supplement: Supplementary file 4 [file fr-21-183-2018-supplement.zip]
